# Supplementary material for: Computational screening of combinatorial catalyst librariesElectronic supplementary information (ESI) available: predicted and observed e.e. values for the 88 catalysts in the library; full CoMFA parameters; aligned molecular coordinates. See http://www.rsc.org/suppdata/cc/b4/b402378a/
Source: Royal Society of Chemistry journal article supplement (doi:10.1039/b402378a), 2004-01-01
Supplement: b402378a.doc [file b402378a.doc]

# Supplementary Information

***Table S1:*** Observed, predicted and fitted enantiomeric excesses of the 70 training catalysts.

| R1 (N)a | R2 (O)a | %eeobsb | %eecvc,d | %eefitc,d | R1 (N)a | R2 (O)a | %eeobsb | %eecvc,d | %eefitc,d |
| --- | --- | --- | --- | --- | --- | --- | --- | --- | --- |
| **1** | **1** | 26 | 36 | 32 | **3** | **7** | 80 | 73 | 73 |
| **1** | **2** | 26 | 41 | 37 | **3** | **8** | 75 | 70 | 71 |
| **1** | **3** | 22 | 45 | 39 | **3** | **9** | 49 | 74 | 69 |
| **1** | **5** | 25 | 29 | 25 | **3** | **10** | 74 | 71 | 72 |
| **1** | **6** | 29 | 29 | 28 | **3** | **11** | 60 | 74 | 72 |
| **1** | **7** | 18 | 31 | 24 | **5** | **1** | 26 | 33 | 31 |
| **1** | **8** | 33 | 19 | 20 | **5** | **2** | 28 | 38 | 36 |
| **1** | **9** | 42 | 10 | 16 | **5** | **3** | 33 | 40 | 38 |
| **1** | **10** | 28 | 23 | 23 | **5** | **5** | 16 | 30 | 23 |
| **1** | **11** | 26 | 24 | 22 | **5** | **6** | 27 | 28 | 27 |
| **3** | **1** | 80 | 76 | 77 | **5** | **7** | 23 | 28 | 23 |
| **3** | **2** | 79 | 79 | 79 | **5** | **8** | 21 | 20 | 19 |
| **3** | **3** | 79 | 81 | 80 | **5** | **9** | 25 | 15 | 15 |
| **3** | **5** | 82 | 71 | 73 | **5** | **10** | 21 | 24 | 22 |
| **3** | **6** | 68 | 77 | 75 | **5** | **11** | 33 | 19 | 21 |

*a* For the structures of the substituents, see Scheme 2. *b* For constructing the QSSR, the %ee values are converted to selectivity ratios using the formula *s* = (100 + %ee) / (100 - %ee). ln *s* was used to construct the regression model. *c* The fitted and cross-validated %ee values were back-converted from the ln *s* values obtained from the regression model. *d* Cross-validated/fitted values from a five component model.

***Table S1 continued.*** Observed, predicted and fitted enantiomeric excesses of the 70 training catalysts.

| R1 (N)a | R2 (O)a | %eeobsb | %eecvc,d | %eefitc,d | R1 (N)a | R2 (O)a | %eeobsb | %eecvc,d | %eefitc,d |
| --- | --- | --- | --- | --- | --- | --- | --- | --- | --- |
| **6** | **1** | 39 | 66 | 62 | **7** | **1** | 29 | 36 | 36 |
| **6** | **2** | 80 | 60 | 65 | **7** | **2** | 24 | 42 | 41 |
| **6** | **3** | 86 | 59 | 66 | **7** | **3** | 34 | 43 | 43 |
| **6** | **5** | 45 | 59 | 56 | **7** | **5** | 29 | 26 | 29 |
| **6** | **6** | 80 | 51 | 59 | **7** | **6** | 31 | 29 | 32 |
| **6** | **7** | 51 | 56 | 56 | **7** | **7** | 31 | 22 | 28 |
| **6** | **8** | 44 | 55 | 53 | **7** | **8** | 32 | 21 | 24 |
| **6** | **9** | 44 | 52 | 50 | **7** | **9** | 37 | 13 | 20 |
| **6** | **10** | 40 | 59 | 55 | **7** | **10** | 31 | 24 | 27 |
| **6** | **11** | 30 | 59 | 54 | **7** | **11** | 29 | 23 | 26 |

*a* For the structures of the substituents, see Scheme 2. *b* For constructing the QSSR, the %ee values are converted to selectivity ratios using the formula *s* = (100 + %ee) / (100 - %ee). ln *s* was used to construct the regression model. *c* The fitted and cross-validated %ee values were back-converted from the ln *s* values obtained from the regression model. *d* Cross-validated/fitted values from a five component model.

***Table S1 continued.*** Observed, predicted and fitted enantiomeric excesses of the 70 training catalysts.

| R1 (N)a | R2 (O)a | %eeobsb | %eecvc,d | %eefitc,d | R1 (N)a | R2 (O)a | %eeobsb | %eecvc,d | %eefitc,d |
| --- | --- | --- | --- | --- | --- | --- | --- | --- | --- |
| **12** | **1** | 27 | 51 | 48 | **13** | **1** | 93 | 84 | 86 |
| **12** | **2** | 55 | 51 | 52 | **13** | **2** | 88 | 87 | 88 |
| **12** | **3** | 51 | 53 | 53 | **13** | **3** | 93 | 86 | 88 |
| **12** | **5** | 47 | 40 | 41 | **13** | **5** | 83 | 84 | 84 |
| **12** | **6** | 46 | 41 | 44 | **13** | **6** | 70 | 88 | 85 |
| **12** | **7** | 47 | 37 | 40 | **13** | **7** | 80 | 84 | 84 |
| **12** | **8** | 24 | 40 | 37 | **13** | **8** | 90 | 80 | 83 |
| **12** | **9** | 33 | 33 | 33 | **13** | **9** | 74 | 82 | 81 |
| **12** | **10** | 41 | 39 | 39 | **13** | **10** | 83 | 83 | 83 |
| **12** | **11** | 46 | 36 | 38 | **13** | **11** | 78 | 84 | 83 |

*a* For the structures of the substituents, see Scheme 2. *b* For constructing the QSSR, the %ee values are converted to selectivity ratios using the formula *s* = (100 + %ee) / (100 - %ee). ln *s* was used to construct the regression model. *c* The fitted and cross-validated %ee values were back-converted from the ln *s* values obtained from the regression model. *d* Cross-validated/fitted values from a five component model.

***Table S2.*** Observed and predicted enantiomeric excesses of the 18 test catalysts using the training model.

| R1 (N)a | R2 (O)a | %eeobsb,c | %eepredb,c |
| --- | --- | --- | --- |
| **1** | **4** | 24 | 36 |
| **3** | **4** | 81 | 79 |
| **4** | **1** | 56 | 70 |
| **4** | **2** | 63 | 73 |
| **4** | **3** | 76 | 74 |
| **4** | **4** | 71 | 72 |
| **4** | **5** | 55 | 66 |
| **4** | **6** | 74 | 68 |
| **4** | **7** | 64 | 65 |
| **4** | **8** | 48 | 63 |
| **4** | **9** | 33 | 60 |
| **4** | **10** | 48 | 65 |
| **4** | **11** | 35 | 64 |
| **5** | **4** | 17 | 35 |
| **6** | **4** | 64 | 64 |
| **7** | **4** | 30 | 40 |
| **12** | **4** | 41 | 51 |
| **13** | **4** | 91 | 87 |

*a* For the structures of the substituents, see Scheme 2. *b* The predicted %ee values were converted from the ln *s* values obtained from the regression model. *c* Predicted values from a five-component model.

***Table S3:*** CoMFA parameters

| **Alignment for R1** | Least squares fit to the three C atoms of substituent **13** |
| --- | --- |
| **Alignment for R2** | Least squares fit to the three C atoms of substituent **3** |
| **Charges** | Gasteiger-Hückel |
| **Probe Type** | C.sp3 |
| **Probe charge** | +1 |
| **Electrostatic cutoff (kcal mol-1)** | 30 |
| **Steric cutoff (kcal mol-1)** | 30 |
| **Dielectric constant** | 5.8 |
| **Dielectric function** | constant |
| **Grid spacing (Å)** | 2 |
| **Lattice dimensions for R1** | 7 × 10 × 9 |
| **Lattice dimensions for R2** | 9 × 8 × 9 |
| **Initial number of variables** | 2556 (1278 electrostatic, 1278 steric) |
| **Column filtering** | 85% of the lowest variance columns were removed from both fields |
| **Cut-off functiona** | Box method |
| **Electrostatic column droppingb** | None |
| **Scalingc** | Block |

a Due to the nature of the Coulomb and Lennard-Jones potentials, field values may theoretically attain an infinite value if a lattice point coincides with an atomic center. The standard CoMFA setting is to apply a cut-off value, so that all field values exceeding 30 kcal mol-1 are assigned a value of 30 kcal mol-1. We use an alternative option which calculates the descriptor as the average of the field values measured at the eight corners of a cube centred around the lattice point, with the side length of the cube being two thirds of the standard lattice spacing.

b With column dropping, electrostatic field values that occur within the van der Waals surface of the molecule (i.e. at lattice points that record a steric field value of equal to or greater than the steric cutoff) can be replaced by the average value of all electrostatic values at that lattice point that were not within the steric cutoff of their respective molecules. This has the effect of removing these lattice points from the PLS analysis. However, in this study, we found that not using column dropping gave markedly better results.

c Block scaling is achieved by grouping together the steric and electrostatic descriptors into separates blocks. The sum of the squares of each block is then equalized. This equalizes the variance *between* blocks, while maintaining the variance between descriptors *within* each block. During cross-validation, no further scaling occurs when observations are removed from the training set. The columns are, however, recentred.
